# Supplementary material for: Dissertation writing in post graduate medical education
Source: PubMed Central journal article supplement — Indian J Anaesth. 2022 Feb 3;66(1):34–46. doi: 10.4103/ija.ija_1106_21 (PMC8929320; doi:10.4103/ija.ija_1106_21), 2022-02-03
Supplement: IJA-66-34_Suppl4.pdf [file IJA-66-34_Suppl4.pdf]

Supplementary file 4

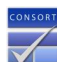

**CONSORT 2010 checklist of information to include when reporting a randomised trial\***

| Section/Topic                                        | Item No | Checklist item                                                                                                                                                                              | Reported on page No |
|------------------------------------------------------|---------|---------------------------------------------------------------------------------------------------------------------------------------------------------------------------------------------|---------------------|
| <b>Title and abstract</b>                            |         |                                                                                                                                                                                             |                     |
|                                                      | 1a      | Identification as a randomised trial in the title                                                                                                                                           | _____               |
|                                                      | 1b      | Structured summary of trial design, methods, results, and conclusions (for specific guidance see CONSORT for abstracts)                                                                     | _____               |
| <b>Introduction</b>                                  |         |                                                                                                                                                                                             |                     |
| Background and objectives                            | 2a      | Scientific background and explanation of rationale                                                                                                                                          | _____               |
|                                                      | 2b      | Specific objectives or hypotheses                                                                                                                                                           | _____               |
| <b>Methods</b>                                       |         |                                                                                                                                                                                             |                     |
| Trial design                                         | 3a      | Description of trial design (such as parallel, factorial) including allocation ratio                                                                                                        | _____               |
|                                                      | 3b      | Important changes to methods after trial commencement (such as eligibility criteria), with reasons                                                                                          | _____               |
| Participants                                         | 4a      | Eligibility criteria for participants                                                                                                                                                       | _____               |
|                                                      | 4b      | Settings and locations where the data were collected                                                                                                                                        | _____               |
| Interventions                                        | 5       | The interventions for each group with sufficient details to allow replication, including how and when they were actually administered                                                       | _____               |
| Outcomes                                             | 6a      | Completely defined pre-specified primary and secondary outcome measures, including how and when they were assessed                                                                          | _____               |
|                                                      | 6b      | Any changes to trial outcomes after the trial commenced, with reasons                                                                                                                       | _____               |
| Sample size                                          | 7a      | How sample size was determined                                                                                                                                                              | _____               |
|                                                      | 7b      | When applicable, explanation of any interim analyses and stopping guidelines                                                                                                                | _____               |
| Randomisation:                                       |         |                                                                                                                                                                                             |                     |
| Sequence generation                                  | 8a      | Method used to generate the random allocation sequence                                                                                                                                      | _____               |
|                                                      | 8b      | Type of randomisation; details of any restriction (such as blocking and block size)                                                                                                         | _____               |
| Allocation concealment mechanism                     | 9       | Mechanism used to implement the random allocation sequence (such as sequentially numbered containers), describing any steps taken to conceal the sequence until interventions were assigned | _____               |
| Implementation                                       | 10      | Who generated the random allocation sequence, who enrolled participants, and who assigned participants to interventions                                                                     | _____               |
| Blinding                                             | 11a     | If done, who was blinded after assignment to interventions (for example, participants, care providers, those assessing outcomes) and how                                                    | _____               |
|                                                      |         | If relevant, description of the similarity of interventions                                                                                                                                 | _____               |
| Statistical methods                                  | 12a     | Statistical methods used to compare groups for primary and secondary outcomes                                                                                                               | _____               |
|                                                      | 12b     | Methods for additional analyses, such as subgroup analyses and adjusted analyses                                                                                                            | _____               |
| <b>Results</b>                                       |         |                                                                                                                                                                                             |                     |
| Participant flow (a diagram is strongly recommended) | 13a     | For each group, the numbers of participants who were randomly assigned, received intended treatment, and were analysed for the primary outcome                                              | _____               |
|                                                      | 13b     | For each group, losses and exclusions after randomisation, together with reasons                                                                                                            | _____               |
| Recruitment                                          | 14a     | Dates defining the periods of recruitment and follow-up                                                                                                                                     | _____               |
|                                                      | 14b     | Why the trial ended or was stopped                                                                                                                                                          | _____               |
| Baseline data                                        | 15      | A table showing baseline demographic and clinical characteristics for each group                                                                                                            | _____               |
| Numbers analysed                                     | 16      | For each group, number of participants (denominator) included in each analysis and whether the analysis was by original assigned groups                                                     | _____               |
| Outcomes and estimation                              | 17a     | For each primary and secondary outcome, results for each group, and the estimated effect size and its precision (such as 95% confidence interval)                                           | _____               |
|                                                      | 17b     | For binary outcomes, presentation of both absolute and relative effect sizes is recommended                                                                                                 | _____               |
| Ancillary analyses                                   | 18      | Results of any other analyses performed, including subgroup analyses and adjusted analyses, distinguishing pre-specified from exploratory                                                   | _____               |
| Harms                                                | 19      | All important harms or unintended effects in each group (for specific guidance see CONSORT for harms)                                                                                       | _____               |
| <b>Discussion</b>                                    |         |                                                                                                                                                                                             |                     |
| Limitations                                          | 20      | Trial limitations, addressing sources of potential bias, imprecision, and, if relevant, multiplicity of analyses                                                                            | _____               |
| Generalisability                                     | 21      | Generalisability (external validity, applicability) of the trial findings                                                                                                                   | _____               |
| Interpretation                                       | 22      | Interpretation consistent with results, balancing benefits and harms, and considering other relevant evidence                                                                               | _____               |
| <b>Other information</b>                             |         |                                                                                                                                                                                             |                     |
| Registration                                         | 23      | Registration number and name of trial registry                                                                                                                                              | _____               |
| Protocol                                             | 24      | Where the full trial protocol can be accessed, if available                                                                                                                                 | _____               |
| Funding                                              | 25      | Sources of funding and other support (such as supply of drugs), role of funders                                                                                                             | _____               |

## STROBE Statement—checklist of items that should be included in reports of observational studies

|                              | Item No | Recommendation                                                                                                                                                                                                                                                                                                                                                                                                                                                                                                                                                                                                                                                                                   | Page No |
|------------------------------|---------|--------------------------------------------------------------------------------------------------------------------------------------------------------------------------------------------------------------------------------------------------------------------------------------------------------------------------------------------------------------------------------------------------------------------------------------------------------------------------------------------------------------------------------------------------------------------------------------------------------------------------------------------------------------------------------------------------|---------|
| <b>Title and abstract</b>    | 1       | (a) Indicate the study's design with a commonly used term in the title or the abstract<br>(b) Provide in the abstract an informative and balanced summary of what was done and what was found                                                                                                                                                                                                                                                                                                                                                                                                                                                                                                    |         |
| <b>Introduction</b>          |         |                                                                                                                                                                                                                                                                                                                                                                                                                                                                                                                                                                                                                                                                                                  |         |
| Background/rationale         | 2       | Explain the scientific background and rationale for the investigation being reported                                                                                                                                                                                                                                                                                                                                                                                                                                                                                                                                                                                                             |         |
| Objectives                   | 3       | State specific objectives, including any prespecified hypotheses                                                                                                                                                                                                                                                                                                                                                                                                                                                                                                                                                                                                                                 |         |
| <b>Methods</b>               |         |                                                                                                                                                                                                                                                                                                                                                                                                                                                                                                                                                                                                                                                                                                  |         |
| Study design                 | 4       | Present key elements of study design early in the paper                                                                                                                                                                                                                                                                                                                                                                                                                                                                                                                                                                                                                                          |         |
| Setting                      | 5       | Describe the setting, locations, and relevant dates, including periods of recruitment, exposure, follow-up, and data collection                                                                                                                                                                                                                                                                                                                                                                                                                                                                                                                                                                  |         |
| Participants                 | 6       | (a) <i>Cohort study</i> —Give the eligibility criteria, and the sources and methods of selection of participants. Describe methods of follow-up<br><i>Case-control study</i> —Give the eligibility criteria, and the sources and methods of case ascertainment and control selection. Give the rationale for the choice of cases and controls<br><i>Cross-sectional study</i> —Give the eligibility criteria, and the sources and methods of selection of participants<br>(b) <i>Cohort study</i> —For matched studies, give matching criteria and number of exposed and unexposed<br><i>Case-control study</i> —For matched studies, give matching criteria and the number of controls per case |         |
| Variables                    | 7       | Clearly define all outcomes, exposures, predictors, potential confounders, and effect modifiers. Give diagnostic criteria, if applicable                                                                                                                                                                                                                                                                                                                                                                                                                                                                                                                                                         |         |
| Data sources/<br>measurement | 8*      | For each variable of interest, give sources of data and details of methods of assessment (measurement). Describe comparability of assessment methods if there is more than one group                                                                                                                                                                                                                                                                                                                                                                                                                                                                                                             |         |
| Bias                         | 9       | Describe any efforts to address potential sources of bias                                                                                                                                                                                                                                                                                                                                                                                                                                                                                                                                                                                                                                        |         |
| Study size                   | 10      | Explain how the study size was arrived at                                                                                                                                                                                                                                                                                                                                                                                                                                                                                                                                                                                                                                                        |         |
| Quantitative variables       | 11      | Explain how quantitative variables were handled in the analyses. If applicable, describe which groupings were chosen and why                                                                                                                                                                                                                                                                                                                                                                                                                                                                                                                                                                     |         |
| Statistical methods          | 12      | (a) Describe all statistical methods, including those used to control for confounding<br>(b) Describe any methods used to examine subgroups and interactions<br>(c) Explain how missing data were addressed<br>(d) <i>Cohort study</i> —If applicable, explain how loss to follow-up was addressed<br><i>Case-control study</i> —If applicable, explain how matching of cases and controls was addressed<br><i>Cross-sectional study</i> —If applicable, describe analytical methods taking account of sampling strategy<br>(e) Describe any sensitivity analyses                                                                                                                                |         |
| <b>Results</b>               |         |                                                                                                                                                                                                                                                                                                                                                                                                                                                                                                                                                                                                                                                                                                  |         |
| Participants                 | 13*     | (a) Report numbers of individuals at each stage of study—eg numbers potentially eligible, examined for eligibility, confirmed eligible, included in the study, completing follow-up, and analysed<br>(b) Give reasons for non-participation at each stage<br>(c) Consider use of a flow diagram                                                                                                                                                                                                                                                                                                                                                                                                  |         |
| Descriptive data             | 14*     | (a) Give characteristics of study participants (eg demographic, clinical, social) and information on exposures and potential confounders<br>(b) Indicate number of participants with missing data for each variable of interest<br>(c) <i>Cohort study</i> —Summarise follow-up time (eg, average and total amount)                                                                                                                                                                                                                                                                                                                                                                              |         |
| Outcome data                 | 15*     | <i>Cohort study</i> —Report numbers of outcome events or summary measures over time<br><i>Case-control study</i> —Report numbers in each exposure category, or summary measures of exposure<br><i>Cross-sectional study</i> —Report numbers of outcome events or summary measures                                                                                                                                                                                                                                                                                                                                                                                                                |         |
| Main results                 | 16      | (a) Give unadjusted estimates and, if applicable, confounder-adjusted estimates and their precision (eg, 95% confidence interval). Make clear which confounders were adjusted for and why they were included<br>(b) Report category boundaries when continuous variables were categorized<br>(c) If relevant, consider translating estimates of relative risk into absolute risk for a meaningful time period                                                                                                                                                                                                                                                                                    |         |
| Other analyses               | 17      | Report other analyses done—eg analyses of subgroups and interactions, and sensitivity analyses                                                                                                                                                                                                                                                                                                                                                                                                                                                                                                                                                                                                   |         |
| <b>Discussion</b>            |         |                                                                                                                                                                                                                                                                                                                                                                                                                                                                                                                                                                                                                                                                                                  |         |
| Key results                  | 18      | Summarise key results with reference to study objectives                                                                                                                                                                                                                                                                                                                                                                                                                                                                                                                                                                                                                                         |         |
| Limitations                  | 19      | Discuss limitations of the study, taking into account sources of potential bias or imprecision. Discuss both direction and magnitude of any potential bias                                                                                                                                                                                                                                                                                                                                                                                                                                                                                                                                       |         |
| Interpretation               | 20      | Give a cautious overall interpretation of results considering objectives, limitations, multiplicity of analyses, results from similar studies, and other relevant evidence                                                                                                                                                                                                                                                                                                                                                                                                                                                                                                                       |         |
| Generalisability             | 21      | Discuss the generalisability (external validity) of the study results                                                                                                                                                                                                                                                                                                                                                                                                                                                                                                                                                                                                                            |         |
| <b>Other information</b>     |         |                                                                                                                                                                                                                                                                                                                                                                                                                                                                                                                                                                                                                                                                                                  |         |
| Funding                      | 22      | Give the source of funding and the role of the funders for the present study and, if applicable, for the original study on which the present article is based                                                                                                                                                                                                                                                                                                                                                                                                                                                                                                                                    |         |
