# Supplementary material for: Dissertation writing in post graduate medical education
Source: PubMed Central journal article supplement — Indian J Anaesth. 2022 Feb 3;66(1):34–46. doi: 10.4103/ija.ija_1106_21 (PMC8929320; doi:10.4103/ija.ija_1106_21), 2022-02-03
Supplement: IJA-66-34_Suppl5.pdf [file IJA-66-34_Suppl5.pdf]

## Supplementary file 5. Writing the references from various sources

### 1. Journals

#### Print Journals

- i. Number of authors between 1-6

All the authors' names are listed with authors' surname up to two initials, separating each author's name with a comma. The article title with only the first letter of the article is capitalised. The title of the journal is abbreviated as per the NLM nomenclature followed by date of publication with year with all 4 numerals and first three letters of the month and date followed by volume number with issue number in the bracket, and lastly followed by page numbers in an abbreviated form.

e.g., Panditrao MM, Panditrao MM, Fernandes AJ, Gill GS. A study of psycho-behavioral patterns in patients emerging from general anesthesia using sevoflurane, propofol and their combination in early, intermediate, and late post-operative period: A randomized controlled trial. *Anesth Essays Res* 2013 May; 7(2):257-62.

- ii. Number of Authors more than 6

Everything as above with an addition of *et al* after the 6<sup>th</sup> name..

e.g., Avasthi A, Basu D, Subodh B, Gupta P, Sidhu B, Gargi P, et al. Epidemiology of substance use and dependence in the state of Punjab, India: Results of a household survey on a statewide representative sample. *Asian J Psychiatr* 2018; 33:18–29. DOI: 10.1016/

#### e Journals

- i. Digital Object Identifier (DOI): It is a unique identifier. It should be included wherever possible and available. Generally this alphanumeric string is included on the first page of the article in all the e journal articles. There are two ways of writing 10.25259/AUJMSR\_32\_2020 or <http://dx.doi.org/1015259/a0024996>
- ii. Everything just like print journal except the word [Internet] to be inserted after the name of the journal and the date on which this is being cited to be written after the date of publication.

Both of these to be written in square brackets [....]. the URL (web address) at the end of the reference to be written as available from URL, just before writing the DOI.

e.g., Panditrao MM, Panditrao MM. National Education Policy 2020: What is in it for a student, a parent, a teacher, or us, as a Higher Education Institution/University? Adesh Univ J Med Sci Res [Internet] 2020[cited 2021 Dec.10];2(2):70-9.Available from [https://aujmsr.com/issue/2020-2-2/DOI: 10.25259/AUJMSR\\_32\\_2020](https://aujmsr.com/issue/2020-2-2/DOI: 10.25259/AUJMSR_32_2020)

e.g., For more than 6 authors exactly same as above with names of the first 6 authors followed by *et al* to be written.

## 2. Books/ Book Chapters

### Print Books: Entire Book

- i. Name of the editor/s, followed by the title of the book in *italics*, number of the edition, place of publication, year of publication, page numbers in an abbreviated form.

e.g., Cousins MJ, Bridenbaugh PO (eds). Neural Blockade in Clinical Anaesthesia and Management of Pain, Philadelphia, PA: Lippincott–Raven, 1998;1113

### Print Book Chapters

- i. Author's surname and two initials. If more than 6 authors, then write names of the first 6 authors followed by *et al*. The editor/s name to be written followed by the title of the book in *italics*, number of the edition, place of Publication, year of publication, page numbers in an abbreviated form.

e.g., Panditrao MM, Panditrao MM. Obstetric Analgesia and Anaesthesia in High-Risk Pregnancies. In: Hemant Deshpande (Ed) High Risk Pregnancy& Delivery. 2<sup>nd</sup> ed. New Delhi, London, JayPee Brothers Medical Publishers, 2021; 340-349.

### eBooks

- i. Author's or editor's name/s, title of the web page followed by [Internet], place of publication, publisher of the website, year of publication [year mon date] number of the pages, Available at URL, lastly DOI.

- ii. The rules for 1-6 names or more than 6 names, do apply here also.  
e.g., Halpen-Felsher BL, Morrell HE. Preventing and reducing tobacco use. In: Berlan ED, Bravender T, editors. Adolescent medicine today: a guide to caring for the adolescent patient[Internet]. Singapore: World Scientific Publishing Co.; 2012 [Cited 2021 Dec 10]. Chapter 18. Available from [http://www.worldscientific.com/doi/pdf/10.1142/978914324496\\_18](http://www.worldscientific.com/doi/pdf/10.1142/978914324496_18)

### **3. Government/ Corporates/ other Reports**

- i. Same rules for Name/s of authors (6 or more than 6) to be followed. In case only editor/s, their names.
- ii. When name of the author is an organisation, government or corporate, then the name is written without 'The' preceding the name. followed by the first 2 letters of the country of origin in round brackets (..).
- iii. Rest of the rules for books/ e books apply here.  
e.g., Rowe IL, Carson NE. Medical manpower in Victoria. East Bentleigh (AU): Monash University, Department of Community Practice; 1981. 35 p. Report No.: 4.

### **4. Internet**

- i. Name of the author in the order as on the website. name of the homepage as is evident on the screen. Place title followed by [internet]. The place of publication follows this. If [place unknown], then written in a square bracket. The owner of the home page is placed next along with date of publication, year followed by the date on which was cited. Lastly, Available from URL, where the endpoint is either slash (/) if there, otherwise with no full stop.  
e.g., Diabetes Australia. Diabetes globally [Internet]. Canberra ACT: Diabetes Australia; 2012 [updated 2012 June 15; cited 2012 Nov 5]. Available from: <http://www.diabetesaustralia.com.au/en/Understanding-Diabetes/Diabetes-Globally/>
- ii. In case of an image from the internet, author/organisation followed by the title of the image if known, if not, to be constructed with words followed by [image on Internet], rest as mentioned above.

## **5. Dictionaries/ Encyclopaedias/ online reference site**

- i. Title of the dictionary/ encyclopaedia, followed by [Internet], place of publication, publisher, year, title of the article[updated year mon date, cited year mon date] number of page/s, Available from URL

e.g., A.D.A.M. medical encyclopaedia [Internet]. Atlanta (Ga): A.D.A.M., INC.; c2005. Ear barotrauma; [updated 2006 Oct 20; cited 2021 Dec 10 Available from <http://www.nlm.nih.gov/medlineplus/ency/article/001064.htm>

## **6. Audio-visual media/ web video files/ other media**

- i. Author name/s, Title[format], place of publication, year of description. Description of the item.

e.g., Subbarao M. Tough cases of carotid stenting [DVD], Woodbury (CT); Cine-Med Inc; 2003, 1 DVD, colour, 43/4 in.

## **7. Conferences/ CMEs/ Association meetings**

- i. Author/s, Title of the conference paper followed by In: editor/organisation. Title in italics, place, publisher/organiser, year, page numbers using p before the number.
